# Supplementary material for: Two decades of demography reveals that seed and seedling transitions limit population persistence in a translocated shrub
Source: PubMed Central journal article supplement (PMC4071100; doi:10.1093/aob/mcu082), 2014-05-20
Supplement: supp_mcu082_mcu082supp_data.pdf [file supp_mcu082_mcu082supp_data.pdf]

## SUPPLEMENTARY DATA

Table S1. Summary of vital rates for the transitions and lambda from 1998–2005 in 38 cohorts. See text for definition of transition states. Later transitions are often 0 as plants did not live beyond year 3. Data are means  $\pm$  s.e. (s.d.) Lambda was also calculated using the larger data-set of 98 matrices and was found overall to be  $0.76 \pm 0.01$  (0.13).

| Year      | No. of cohorts | SD <sub>2</sub> to J | J <sub>1</sub> to AD <sub>1</sub> | AD <sub>1</sub> to AD <sub>2</sub> | AD <sub>2</sub> to AD <sub>3</sub> | AD <sub>3</sub> to AD <sub>4</sub> | Lambda           |
|-----------|----------------|----------------------|-----------------------------------|------------------------------------|------------------------------------|------------------------------------|------------------|
| 1998      | 6              | 0.43±0.08(0.19)      | 0.51±0.10(0.25)                   | 0.64±0.13(0.31)                    | 0.10±0.10(0.24)                    | 0.00±0.00(0.00)                    | 0.81±0.005(0.06) |
| 1999      | 6              | 0.58±0.08(0.20)      | 0.40±0.12(0.28)                   | 0.38±0.12(0.29)                    | 0.42±0.09(0.21)                    | 0.00±0.00(0.00)                    | 0.76±0.01(0.13)  |
| 2000      | 6              | 0.45±0.10(0.24)      | 0.29±0.09(0.23)                   | 0.37±0.12(0.30)                    | 0.33±0.04(0.10)                    | 0.51±0.13(0.31)                    | 0.69±0.01(0.11)  |
| 2001      | 4              | 0.21±0.10(0.19)      | 0.32±0.11(0.22)                   | 0.42±0.20(0.39)                    | 0.11±0.04(0.08)                    | 0.33±0.23(0.45)                    | 0.76±0.02(0.15)  |
| 2002      | 3              | 0.60±0.20(0.35)      | 0.50±0.29(0.5)                    | 0.75±0.16(0.28)                    | 0.78±0.15(0.25)                    | 0.25±0.25(0.43)                    | 0.87±0.03(0.22)  |
| 2003      | 4              | 0.53±0.12(0.23)      | 0.73±0.12(0.23)                   | 0.16±0.16(0.31)                    | 0.38±0.24(0.48)                    | 0.10±0.10(0.20)                    | 0.71±0.01(0.08)  |
| 2004      | 5              | 0.23±0.09(0.19)      | 0.74±0.06(0.12)                   | 0.74±0.12(0.27)                    | 0.07±0.07(0.15)                    | 0.20±0.20(0.44)                    | 0.75±0.01(0.09)  |
| 2005      | 4              | 0.49±0.09(0.17)      | 0.61±0.09(0.17)                   | 0.54±0.05(0.09)                    | 0.30±0.20(0.35)                    | 0.00±0.00(0.00)                    | 0.89±0.01(0.08)  |
| All years | 38             | 0.43±0.038(0.24)     | 0.50±0.045(0.28)                  | 0.49±0.05(0.32)                    | 0.29±0.05(0.30)                    | 0.17±0.05(0.31)                    | 0.77±0.01(0.13)  |

Table S2. The average matrix (n = 38) from 10 populations. SB<sub>0</sub> = seed bank in the first year at time 0, SB<sub>1</sub> = seed bank in the second year at time 1, etc.; SD<sub>1</sub> = germinants <30 d old, SD<sub>2</sub> = seedling >30 d old, <20 cm tall, J<sub>1</sub> = vegetative juvenile, AD<sub>1</sub> = adult in first year, AD<sub>2</sub> = adult in year 2, etc..

|                 | SB <sub>0</sub> | SB <sub>1</sub> | SB <sub>2</sub> | SB <sub>3</sub> | SB <sub>4</sub> | SD <sub>1</sub> | SD <sub>2</sub> | J <sub>1</sub> | AD <sub>1</sub> | AD <sub>2</sub> | AD <sub>3</sub> | AD <sub>4</sub> |
|-----------------|-----------------|-----------------|-----------------|-----------------|-----------------|-----------------|-----------------|----------------|-----------------|-----------------|-----------------|-----------------|
| SB <sub>0</sub> | 0.58            | 0               | 0               | 0               | 0               | 0               | 0               | 0              | 408             | 2040            | 13600           | 6800            |
| SB <sub>1</sub> | 0.0056          | 0               | 0               | 0               | 0               | 0               | 0               | 0              | 0               | 0               | 0               | 0               |
| SB <sub>2</sub> | 0               | 0.0023          | 0               | 0               | 0               | 0               | 0               | 0              | 0               | 0               | 0               | 0               |
| SB <sub>3</sub> | 0               | 0               | 0.0018          | 0               | 0               | 0               | 0               | 0              | 0               | 0               | 0               | 0               |
| SB <sub>4</sub> | 0               | 0               | 0               | 0.0014          | 0               | 0               | 0               | 0              | 0               | 0               | 0               | 0               |
| SD <sub>1</sub> | 0.0054          | 0.0039          | 0.0012          | 0.0011          | 0.0013          | 0               | 0               | 0              | 0               | 0               | 0               | 0               |
| SD <sub>2</sub> | 0               | 0               | 0               | 0               | 0               | 0.025           | 0               | 0              | 0               | 0               | 0               | 0               |
| J <sub>1</sub>  | 0               | 0               | 0               | 0               | 0               | 0               | 0.436906        | 0              | 0               | 0               | 0               | 0               |
| AD <sub>1</sub> | 0               | 0               | 0               | 0               | 0               | 0               | 0               | 0.501418       | 0               | 0               | 0               | 0               |
| AD <sub>2</sub> | 0               | 0               | 0               | 0               | 0               | 0               | 0               | 0              | 0.493137        | 0               | 0               | 0               |
| AD <sub>3</sub> | 0               | 0               | 0               | 0               | 0               | 0               | 0               | 0              | 0               | 0.288666        | 0               | 0               |
